# Supplementary material for: Manganese self-boosting hollow nanoenzymes with glutathione depletion for synergistic cancer chemo-chemodynamic therapy
Source: Royal Society of Chemistry journal article supplement (doi:10.1039/d4bm00386a), 2024-01-01
Supplement: d4bm00386a1.pdf [file d4bm00386a1.pdf]

## Supporting Information

### **Manganese Self-boosting Hollow Nanoenzymes with Glutathione Depletion for Synergistic Cancer Chemo-chemodynamic Therapy**

Xinyi Cai<sup>1,‡</sup>, Deng Cai<sup>2,‡</sup>, Xiaozhen Wang<sup>3,‡</sup>, Dou Zhang<sup>1</sup>, Long Qiu<sup>1</sup>, Zhenying Diao<sup>1</sup>, Yong Liu<sup>1</sup>, Jianbo Sun<sup>1</sup>, Daxiang Cui<sup>4,\*</sup>, Yanlei Liu<sup>5,\*</sup>, Ting Yin<sup>1,\*</sup>

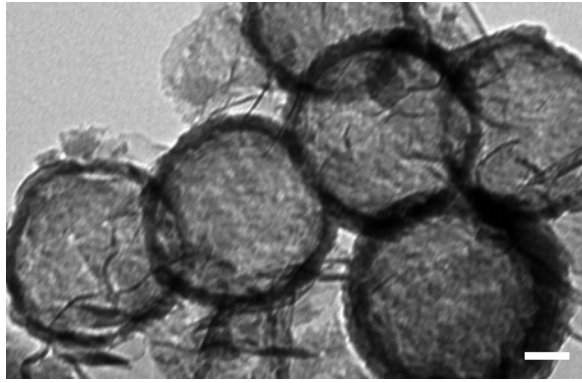

**Figure S1. TEM image of HMnO<sub>2</sub>. Scale bar: 50 nm**

**Table S1. Drug content in HMnO<sub>2</sub>@CDDP determined by ICP.**

| CDDP used for synthesis [mg] | Remaining CDDP content after synthesis [mg] | CDDP loading efficiency [%] | Average loading efficiency [%] |
|------------------------------|---------------------------------------------|-----------------------------|--------------------------------|
| 5                            | 1.91                                        | 61.80%                      | 62.70%                         |
|                              | 1.83                                        | 63.40%                      |                                |
|                              | 1.85                                        | 63.00%                      |                                |

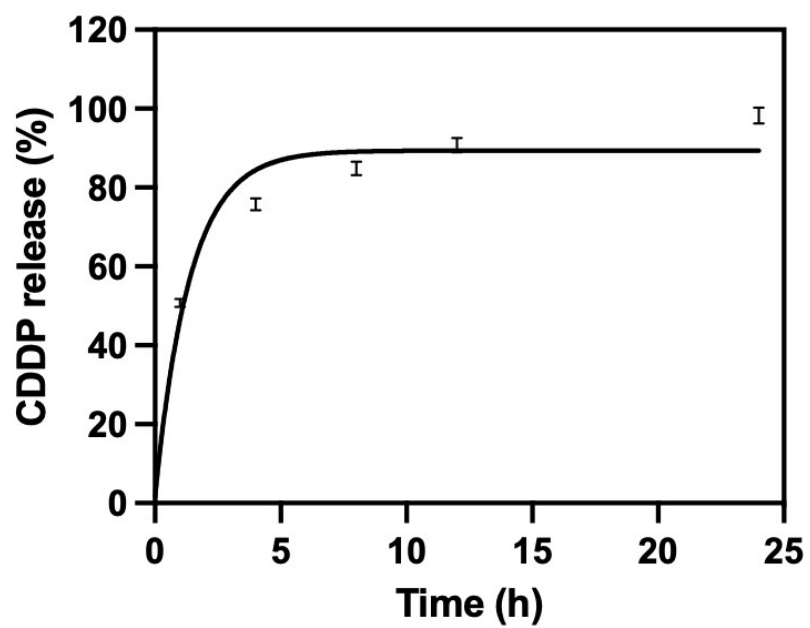

Figure S2. CDDP release profiles of HMnO<sub>2</sub>@CDDP at different time points.

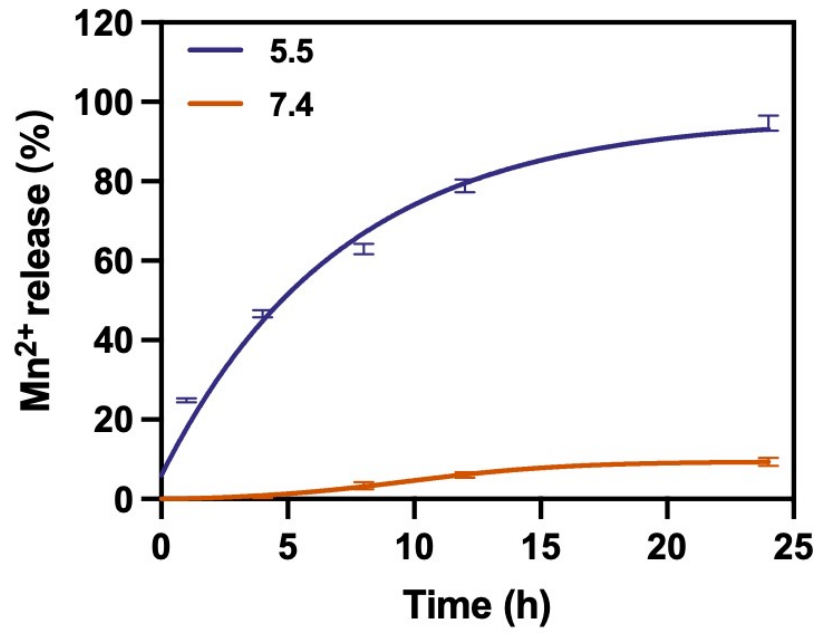

Figure S3. Mn<sup>2+</sup> release profiles of HMnO<sub>2</sub>@CDDP at different pH values.

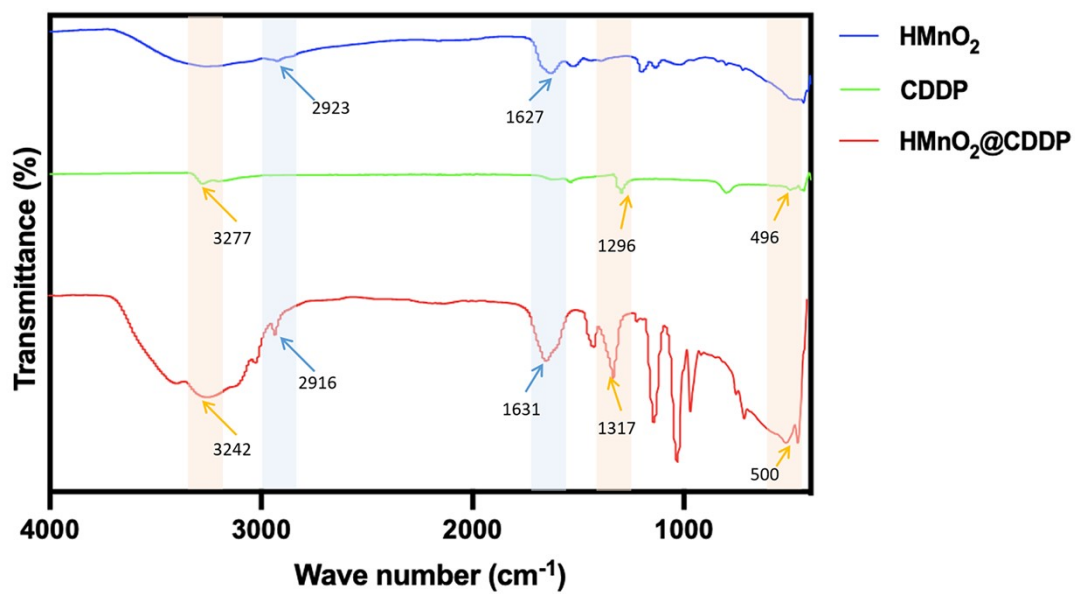

Figure S4. FTIR spectra of  $\text{HMnO}_2$ , CDDP and  $\text{HMnO}_2@\text{CDDP}$ .

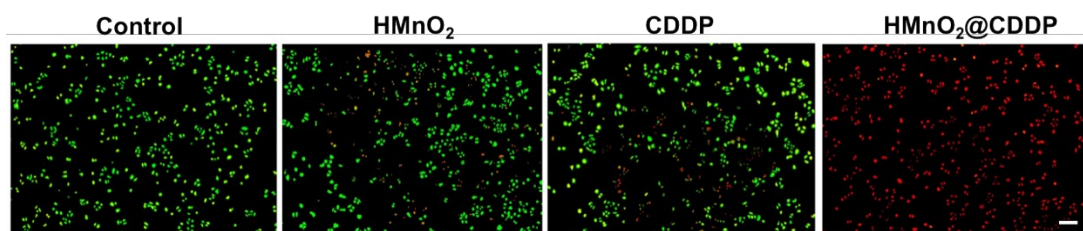

Figure S5. Fluorescence images of Calcein AM (green, live cells) and PI (red, dead cells) co-stained A549 cells treated by different formulations. Scale bar: 100  $\mu$ m.

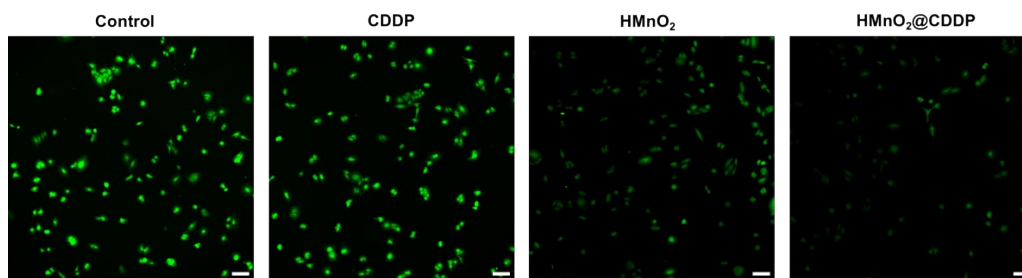

**Figure S6. Fluorescence images of intracellular GSH in A549 cells after treated by different formulations for 12 h. Scale bar: 100 μm.**



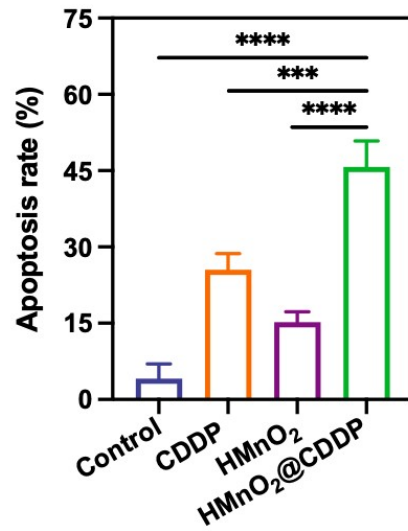

Figure S7. Quantitative analyses of apoptosis in A549 cells treated by different formulations for 12 h. The results are represented as mean  $\pm$  standard deviation (n = 3 per group).

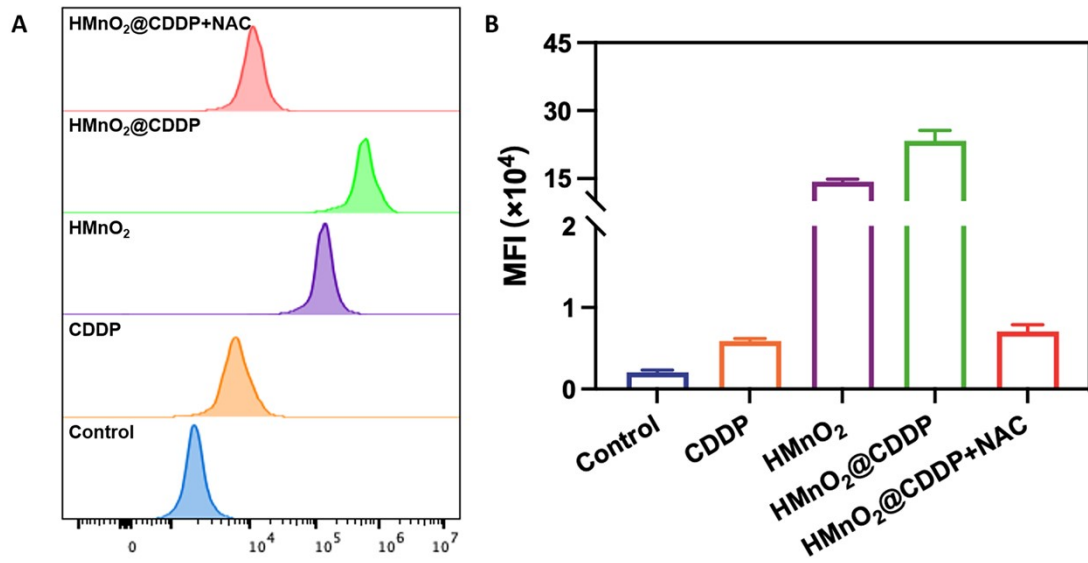

**Figure S8.** Flow cytometric and quantitative analyses of intracellular  $\cdot\text{OH}$  level for A549 cells after being treated by different formulations for 12 h.

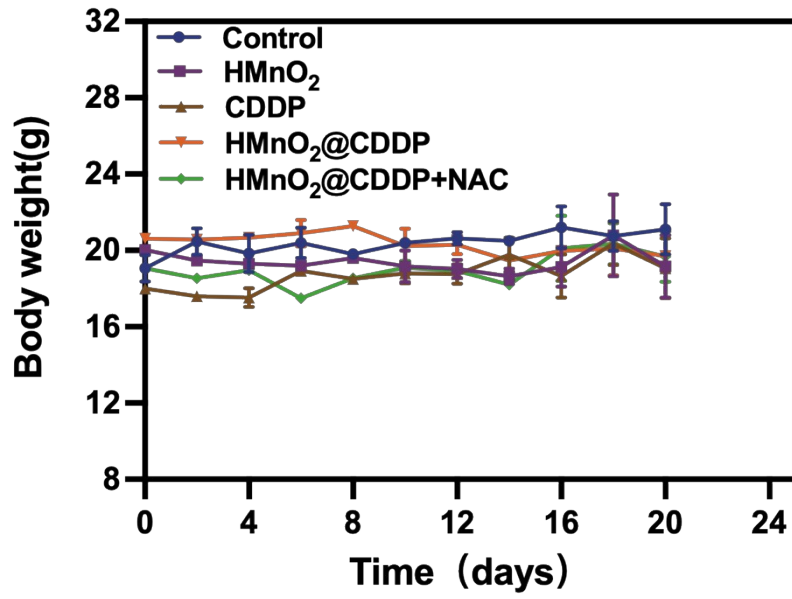

Figure S9. Body weight changes of mice with different treatments.
